# Supplementary material for: Soil Methanotrophy Model (MeMo v1.0): a process-based model to quantify global uptake of atmospheric methane by soil
Source: Copernicus journal article supplement (doi:10.5194/gmd-11-2009-2018), 2018-06-04
Supplement: Supplementary file 1 [file gmd-11-2009-2018-supplement.zip]

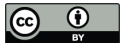

## *Supplement of*

# **Soil Methanotrophy Model (MeMo v1.0): a process-based model to quantify global uptake of atmospheric methane by soil**

**Fabiola Murguía-Flores et al.**

*Correspondence to:* Fabiola Murguía-Flores (fmurguia84@gmail.com)

- gmd-11-2009-2018-supplement-title-page.pdf
- .DS\_Store
- 1.-Supplementary.docx
- 2.-Model\_scripts
  - .DS\_Store
  - 2000\_driving\_data.nc
  - MeMo\_v1.1\_oneyear\_example.R
  - ReadMe.rtf
- 3.-Model\_output
  - MeMo\_1990-2009\_monthly\_corrected.nc
  - MeMo\_2000\_annual\_corrected.nc
  - MeMo\_2000\_monthly\_corrected.nc

The copyright of individual parts of the supplement might differ from the CC BY 3.0 License.
